# Supplementary material for: Evidence that the Great Pacific Garbage Patch is rapidly accumulating plastic
Source: PubMed Central journal article supplement (PMC5864935; doi:10.1038/s41598-018-22939-w), 2018-03-22
Supplement: 41598_2018_22939_MOESM1_ESM.pdf [file 41598_2018_22939_MOESM1_ESM.pdf]

1 **Supplementary Material for ‘Evidence that the Great Pacific Garbage Patch is rapidly**  
2 **accumulating plastic’**

3 *Lebreton L.<sup>1,2, \*</sup>, Slat B.<sup>1</sup>, Ferrari F.<sup>1</sup>, Sainte-Rose B.<sup>1</sup>, Aitken J.<sup>3</sup>, Marthouse R.<sup>3</sup>, Hajbane S.<sup>1</sup>,*  
4 *Cunsolo S.<sup>1,4</sup>, Schwarz A.<sup>1</sup>, Levivier A.<sup>1</sup>, Noble K.<sup>1,5</sup>, Debeljak P.<sup>1,6</sup>, Maral H.<sup>1,7</sup>, Schoeneich-*  
5 *Argent R.<sup>1,8</sup>, Brambini R.<sup>1,9</sup>, Reisser J.<sup>1</sup>*

6

7 <sup>1</sup> The Ocean Cleanup Foundation, Martinus Nijhofflaan 2, Delft 2624 ES, The Netherlands.

8 <sup>2</sup> The Modelling House, 66b Upper Wainui Road, Raglan 3297, New Zealand.

9 <sup>3</sup> Teledyne Optech, Inc., 7225 Stennis Airport Road, Kiln, MS 39556, USA.

10 <sup>4</sup> School of Civil Engineering and Surveying, Faculty of Technology, University of  
11 Portsmouth, Portland Building, Portland Street, Portsmouth, PO1 3AH, UK.

12 <sup>5</sup> Department of Biology, Marine Biology and Environmental Science, Roger Williams  
13 University, 1 Old Ferry Road, Bristol, RI 02809, USA.

14 <sup>6</sup> Sorbonne Universités, UPMC Univ Paris 06, CNRS, Laboratoire d'Océanographie  
15 Microbienne (LOMIC), Observatoire Océanologique, F-66650, Banyuls/mer, France.

16 <sup>7</sup> Department of Civil, Geo and Environmental Engineering, Technical University Munich,  
17 Arcisstraße 21, Munich 80333, Germany.

18 <sup>8</sup> ICBM-Terramare, Carl von Ossietzky University Oldenburg, Schleusenstr. 1,  
19 Wilhelmshaven 26382, Germany.

20 <sup>9</sup> Civil Engineering Department, Aalborg University, Fredrik Bajers Vei 5, Aalborg 9100,  
21 Denmark.

22 \* [laurent.lebreton@theoceancleanup.com](mailto:laurent.lebreton@theoceancleanup.com)

23

## 24 SUPPLEMENTARY METHODS

25

### 26 **Supplementary Methods 1: Ocean plastic rising velocities and depth-integrated** 27 **concentrations**

28 The mass and number of ocean plastics captured by surface net tows may not represent the  
29 total amount of buoyant plastics present in the area sampled. This is because buoyant plastics  
30 can be distributed underwater due to wind-induced vertical mixing. Kukulka et al., 2012<sup>1</sup>  
31 developed a 1-D model that predicts the vertical distribution of buoyant plastics at different  
32 sea states. One of the main parameters of this model is the ocean plastic terminal rising  
33 velocity ( $W_b$ ), which refers to the constant rising velocity driven by the buoyancy of the  
34 object in an undisturbed water column. Previous studies used a constant microplastic  $W_b$   
35 when applying the model of Kukulka<sup>1</sup> to correct surface plastic measurements for vertical  
36 mixing<sup>2 3 4</sup>. However, a recent study indicated<sup>2 3 4</sup> that this velocity changes with plastic  
37 characteristics, such as object shape and size<sup>5</sup>. Here we describe how we measured  $W_b$ , and  
38 used the measurements obtained to estimate the load and number of plastic pieces missed by  
39 our surface trawls (sampling depth = 0.15 and 1 m for Manta and Mega trawl, respectively) at  
40 different sea states (Beaufort 0 - 5). Terminal rise velocities ( $W_b$ ) of ocean plastics were  
41 measured individually, following the method described in Reisser et al., 2015<sup>4</sup>. We randomly  
42 selected 10 - 30 pieces within each of our plastic type/size categories and calculated median  
43  $W_b$  values. For types 'H' and 'N' within size class 10 - 50 cm, we selected a higher number  
44 of pieces (120) to account for the relatively high diversity of objects found within these  
45 categories. We measured the length of the 764 tested pieces using calipers (< 5 mm debris) or  
46 ruler (> 5 mm debris), then soaked them in water for at least 2 hours prior to the experiment  
47 to ensure absence of air bubbles on the pieces' surface. For each piece, the time to rise a  
48 certain distance inside a container with water was recorded in triplicates, using a

49 chronometer. These times were then divided by the distance travelled by the pieces. The  
50 mean value of the resulting triplicates was considered the  $Wb$  of that piece. As the size of the  
51 plastic objects varied largely (0.6 mm - 2.5 m), we used three types of experimental set-ups  
52 (Supplementary Figure 1) for measuring  $Wb$ :

- 53 1. For pieces  $< 5$  mm, we measured the time to rise a distance of 16 cm inside a  
54 transparent cylinder (32 cm long,  $\varnothing$  4 cm) filled with filtered saltwater (salinity 3.5%)  
55 and closed airtight with a rubber stopper. The first 16 cm were used for the pieces to  
56 stabilise and reach their terminal velocity. Each piece was placed in the cylinder,  
57 which was then air-tightened and quickly turned upside down, using a spirit level to  
58 adjust its vertical position.
- 59 2. For 0.5 - 20 cm pieces, we measured the time to rise a distance of 48 cm inside a  
60 transparent tank (100 cm long,  $\varnothing$  50 cm, water level at 96 cm) filled with filtered salt  
61 water (salinity 3.5%). The first 48 cm were used for the pieces to stabilise and reach  
62 its terminal velocity. Pieces were released one by one at the bottom of the tank using  
63 clamps capable of holding and releasing the pieces as needed.
- 64 3. For objects larger than 20 cm, we had to conduct the tests in a freshwater swimming  
65 pool (25 m x 15 m) that could accommodate the dimensions of these debris items. For  
66 very large objects, we measured the time to rise a distance of 2.45 m in a section of  
67 the pool that was 3.6 m deep. The first 1.15 m were used for the stabilization of the  
68 object. For the other objects, we measured the time to rise a distance of 98 cm in a  
69 section of the pool that was 1.5 m deep. The first 52 cm were used for the objects to  
70 stabilise and reach their terminal velocity. The release and observation of objects were  
71 made by at least two divers.

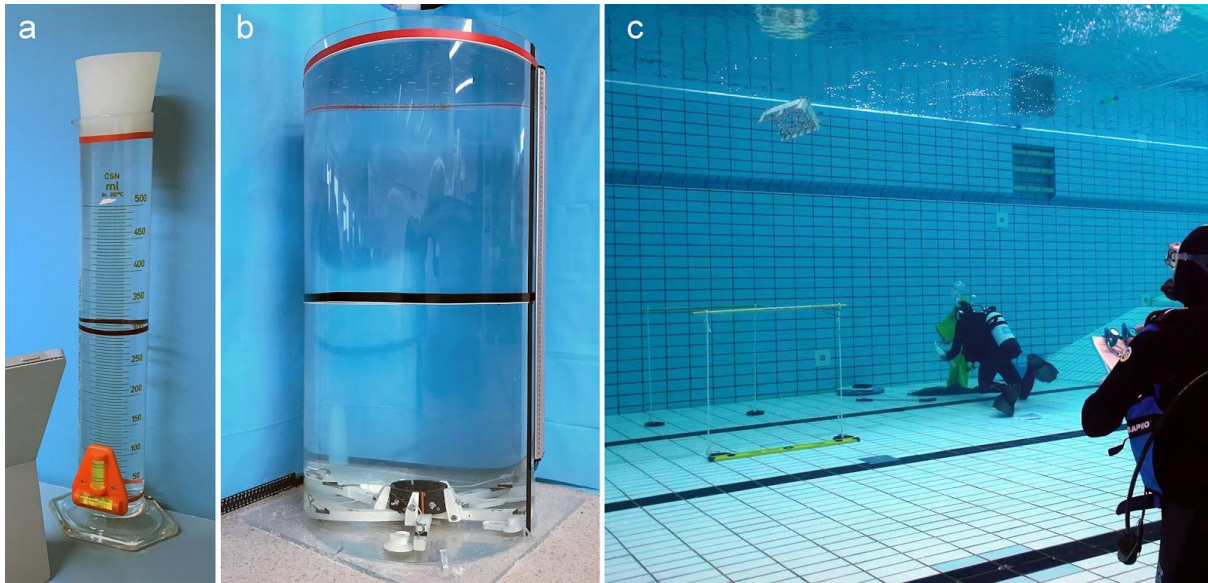

72

73 **Supplementary Figure 1: Experimental set-ups used to measure terminal rising velocity ( $Wb$ ) of ocean**  
 74 **plastics.** Panel 'a' shows the tube used to measure  $Wb$  of 0.5 - 5 mm plastics, 'b' shows the tank used for 0.5 -  
 75 20 cm objects, and 'c' shows the swimming pool set-up for > 20 cm objects. The lines mid-water (black tapes in  
 76 'a' and 'b', yellow stick in 'c') mark the start point for recording the time each particle takes to rise until the  
 77 water surface.

78

79 Since we measured  $Wb$  of some pieces in freshwater rather than saltwater ( $n = 237$ ), we had  
 80 to infer the saltwater  $Wb$  based on freshwater measurements. To do so, 79 pieces had their  
 81  $Wb$  measured in both fresh ( $Wb_f$ ) and saltwater ( $Wb_s$ ) using the  $\varnothing 50$  cm tank described  
 82 above. We found a good correlation between the two types of  $Wb$ , with  $R^2 = 0.84$ . As such,  
 83 we used the resulting regression function ( $Wb_s = 0.9755 * Wb_f + 1.5478$ ) to estimate the  
 84 saltwater  $Wb$  of those pieces that had their speeds measured in the freshwater pool. The  $Wb_f$   
 85 of the pieces used in the swimming pool set-up ranged from  $1 \text{ cm s}^{-1}$  to  $35.7 \text{ cm s}^{-1}$  (mean:  
 86  $6.6 \text{ cm s}^{-1}$ ,  $SD: 4.4 \text{ cm s}^{-1}$ ,  $n = 237$ ). For these samples, the linear regression function  
 87 predicted a mean  $Wb_s$  1.21 times (range: 1.02 - 2.52) larger than  $Wb_f$ .

88 Measured and estimated saltwater  $Wb$  values were grouped by the debris type/size categories  
 89 of this study. Supplementary Figure 2 shows the median, 25<sup>th</sup> and 75<sup>th</sup> percentiles of  $Wb$  for  
 90 each type/size category. Regardless of plastic type,  $Wb$  generally increased with object size.

91 The increase rate is more pronounced for type 'F' objects, with median  $Wb$  ranging from 0.97  
92  $\text{cm s}^{-1}$  to 23.95  $\text{cm s}^{-1}$ , than for other types (1.31 - 9.10  $\text{cm s}^{-1}$  for type 'H', 0.47 - 7.43  $\text{cm s}^{-1}$   
93 for type 'N', and 3.96 - 6.58  $\text{cm s}^{-1}$  for type 'P'). A significant exception was found however  
94 for type 'N' pieces in the 1.5 - 5 cm size class which showed larger  $Wb$  than pieces in the 5 -  
95 10 cm range. This may be attributed to the high occurrence of individual rope knots within  
96 this size range. These tight knots seem to have a larger volume-to-surface ratio when  
97 compared to the elongated and fibrous ropes that dominated the other size classes.

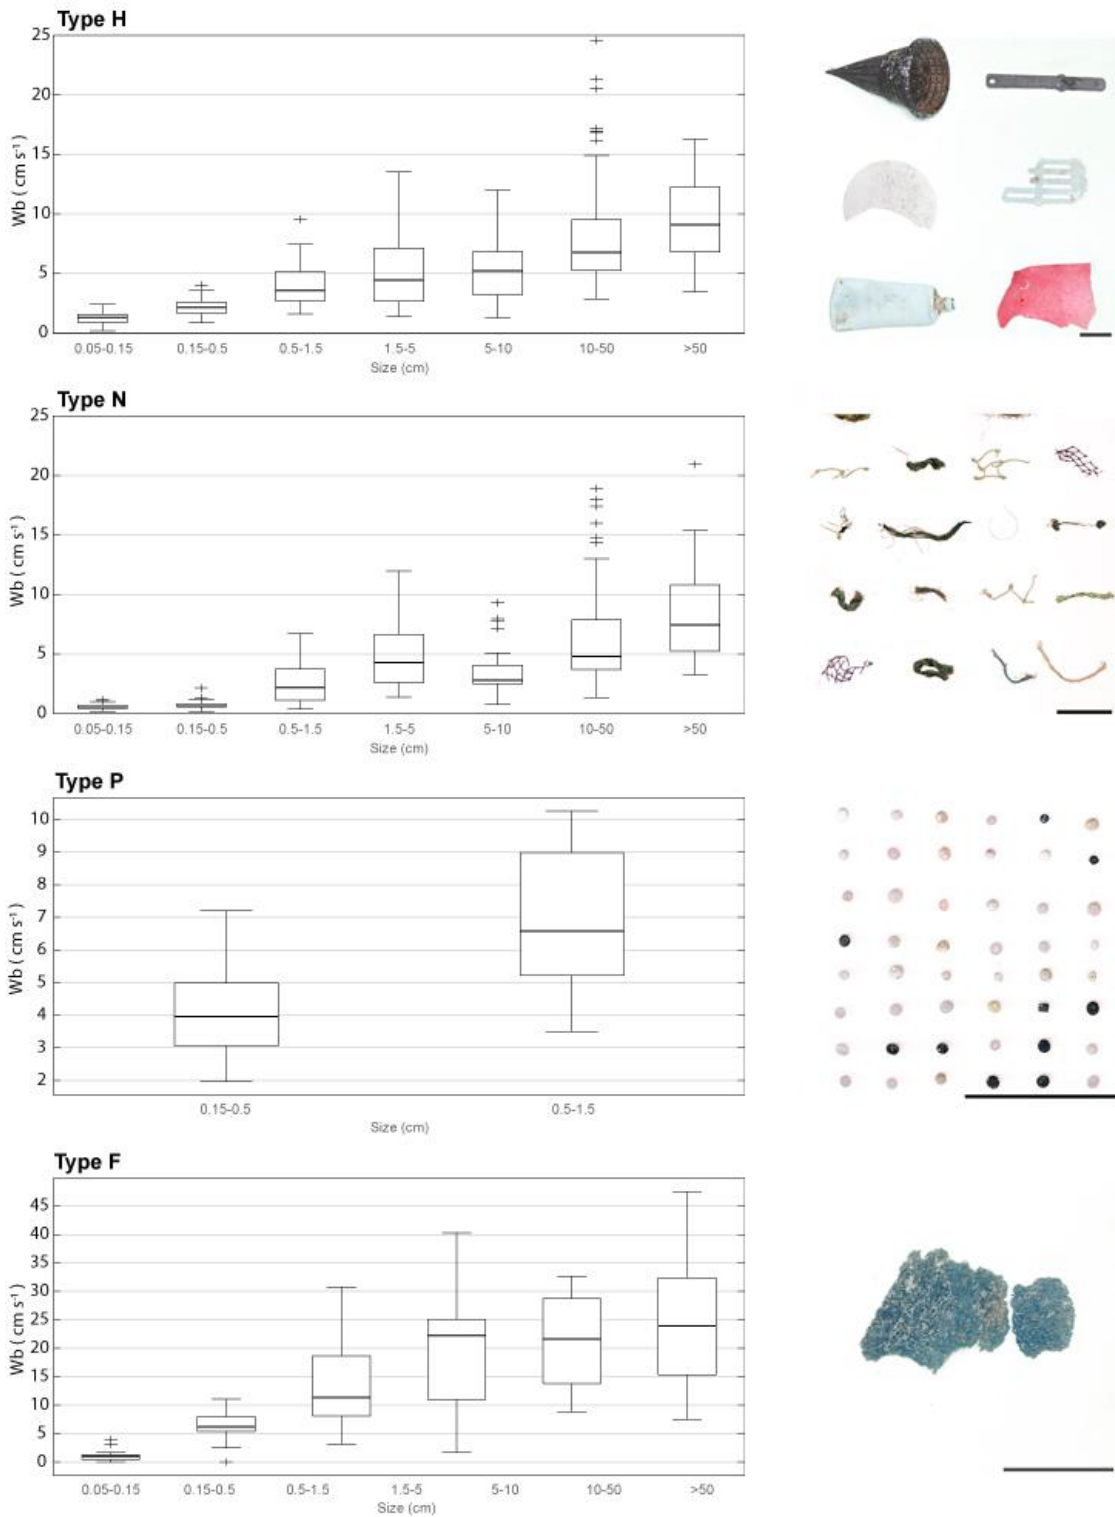

98

99 **Supplementary Figure 2: Terminal rising velocities ( $W_b$ ) of plastics within different size classes and types.**

100 Photographs provide examples of ocean plastic within each type class used in this study. Plastic type H include  
 101 pieces of hard plastic, plastic sheet and film, type N encompasses plastic lines, ropes and fishing nets, type P are  
 102 pre-production plastic pellets, and type F are pieces made of foamed material. The black scale bar within each  
 103 photograph is 5 cm long. Median  $W_b$  are represented as bold lines, boxes range from 25<sup>th</sup> to 75<sup>th</sup> percentiles and

104 whiskers extend from minimum to maximum values not considering outliers which are plotted as crosses. Two  
105 outliers are not shown in the 'Type H' graph: 35.6 and 37.4 cm s<sup>-1</sup> for the 10 - 50 cm size class.

106

107 Our findings on  $Wb$  were included in the formulation from Kukulka et al., 2012 <sup>1</sup>:

$$C_i = \frac{C_s}{1 - e^{-dwbA_0^{-1}}}$$

108

109 Where:  $C_s$  is the concentration of a plastic type/size category as measured by the surface net  
110 tow (in pieces km<sup>-2</sup> or kg km<sup>-2</sup>);  $d$  is the depth sampled by the net tow, equal to 0.15 m for the  
111 Manta trawls and 1 m for the Mega trawls;  $Wb$  is the median terminal rising velocity (m s<sup>-1</sup>)  
112 of plastic within a plastic type/size category; and  $A_0$  is the near-surface turbulent (eddy)  
113 exchange coefficient which was estimated by:

$$A_0 = 1.5u_{*w}kH_s$$

114

115 Where:  $k$  is the von Karman constant, equal to 0.4;  $u_{*w}$  is the frictional velocity of water (in m  
116 s<sup>-1</sup>); and  $H_s$  is the significant wave height (in m). Following Kukulka et al., 2012 <sup>1</sup>, we used  
117 the parametric equation to compute  $H_s$ :

$$H_s = \frac{0.96}{g} \sigma^3 u_a^{*2}$$

118

119 Where:  $g$  is gravitational constant (in m s<sup>-2</sup>);  $\sigma$  is the wave age, equal to 35 (assuming a fully  
120 developed sea state); and  $u_{*a}$  is the air friction velocity (in m s<sup>-1</sup>).  $u_{*w}$  and  $u_{*a}$  were derived  
121 from:

$$u_w^* = \sqrt{\frac{\rho_a}{\rho_w} C_d U^2} \quad u_a^* = \sqrt{C_d U^2}$$

122 Where:  $\rho_a$  is the air density;  $\rho_w$  the seawater density;  $C_d$  the drag coefficient, equal to  $1.2 \cdot 10^{-3}$ ;  
123 and  $U$  is the wind speed during sampling. We considered wind speeds to be equal to 0, 2, 5,

124 9, 13, and 19 knots for sampling events associated with Beaufort sea states 0, 1, 2, 3, 4, and 5  
125 respectively. To account for uncertainties and variabilities in the wind speeds during  
126 sampling and plastic rising velocities, we also estimated ‘minimum’ and ‘maximum’ depth-  
127 integrated concentrations for each of the surface concentrations measured by the trawls. The  
128 ‘minimum’ depth-integrated concentrations were estimated by using the lowest wind speed of  
129 the sea state associated with the field observation (equal to 0, 1, 4, 7, 11, and 17 knots for  
130 Beaufort sea states 0, 1, 2, 3, 4, and 5, respectively) and the 75th percentile of the rising  
131 velocity measurements observed for each plastic type/size category. The ‘maximum’ depth-  
132 integrated concentrations were estimated by using the highest wind speed of the sea state  
133 associated with the field observation (equal to 0, 3, 6, 10, 16, and 21 knots for Beaufort sea  
134 states 0, 1, 2, 3, 4, and 5 respectively) and the 25th percentile of the rising velocity  
135 measurements observed for each plastic type/size category. It is worth noting that some  
136 uncertainties lie with the use of this empirical formula as this linear model was originally  
137 formulated for microplastics, and here we extrapolate to larger debris sizes. The correction  
138 factors used to convert surface plastic concentrations into depth-integrated concentrations are  
139 presented in Supplementary Table 7 for Manta trawl and Supplementary Table 8 for Mega  
140 trawl.

141

142



143 **Supplementary Methods 2: Comparing concentration measurements between Manta**  
144 **and Mega trawls**

145 There is evidence that Manta net tows may underestimate the quantity of large debris items at  
146 the sea surface. For instance, while Cózar et al., 2014 <sup>6</sup> estimated that there are 7,000 – 35,000  
147 tonnes of plastics floating in the world’s oceans using Manta trawl samples only, Eriksen et al.,  
148 2014 <sup>3</sup> estimated that this amount is of at least 250,000 tonnes using Manta trawl samples and  
149 data from visual surveys.

150 On the RV Ocean Starr (largest participating vessel of this study), we concurrently towed four  
151 surface trawls at each of its sampling stations ( $n = 75$ ): two Manta trawls (one from the  
152 starboard beam and one from the port beam), alongside two Mega trawls that were towed from  
153 the aft of the vessel. These concurrent net tows allowed us to compare ‘depth-integrated’ plastic  
154 concentrations estimations coming from Manta and Mega trawls (Supplementary Figure 3) for  
155 the debris size classes sampled by both devices: 1.5 - 5 cm, 5 - 10 cm, 10 - 50 cm, and > 50  
156 cm.

157 Bland and Altman, 1983 <sup>7</sup> recommended an approach to quantify the agreement between two  
158 protocols by plotting the difference in measurements from two methods against the mean of  
159 pair measurements. If the measurement methods are in good agreement, the difference should  
160 be narrow and centred to 0 in relation to the mean of the measurement pair. We used Bland-  
161 Altman plots to assess differences between depth-integrated numerical and mass  
162 concentrations coming from Manta and Mega trawls (Supplementary Figure 4).

163 The Bland-Altman analysis illustrates the zero-inflated distribution of concentrations  
164 measured with Manta trawl for objects >5 cm (macroplastics). Data points aligned on the  $f(x)$   
165  $= x$  function line represent paired measurements for which Manta trawl failed at collecting  
166 debris items while concentrations obtained from the Mega trawl were non-null. Such events  
167 clearly start to appear for debris items >5 cm and are obvious for larger sizes. Calculations of

168 depth-integrated concentrations (blue, green and magenta dots in Supplementary Figure 7)  
169 yield more uncertainties for Manta trawl due to a smaller aperture depth, resulting in a wider  
170 spread of data points in the  $f(x) = -x$  direction. Therefore, we decided to consider the Mega  
171 trawl measurement for debris items  $>5$  cm. However, the concentrations measured with the  
172 Mega trawl also demonstrated a zero-inflated distribution for debris items  $>50$  cm  
173 (megaplastics). Particularly for mass concentration, we calculated a median of  $3.1 \text{ kg km}^{-2}$  ( $n$   
174  $= 150$ ) and a maximum of  $3,172.3 \text{ kg km}^{-2}$  due to the collection of a ghostnet. For the same  
175 reason that Manta trawl sampling misrepresents concentrations of debris items  $>5$  cm, we  
176 concluded that Mega trawl underestimate concentrations of debris items  $>50$  cm. Thus, we  
177 decided to conduct aerial surveys within our study area to sample a larger sea surface area  
178 and better quantify this debris size category.

179

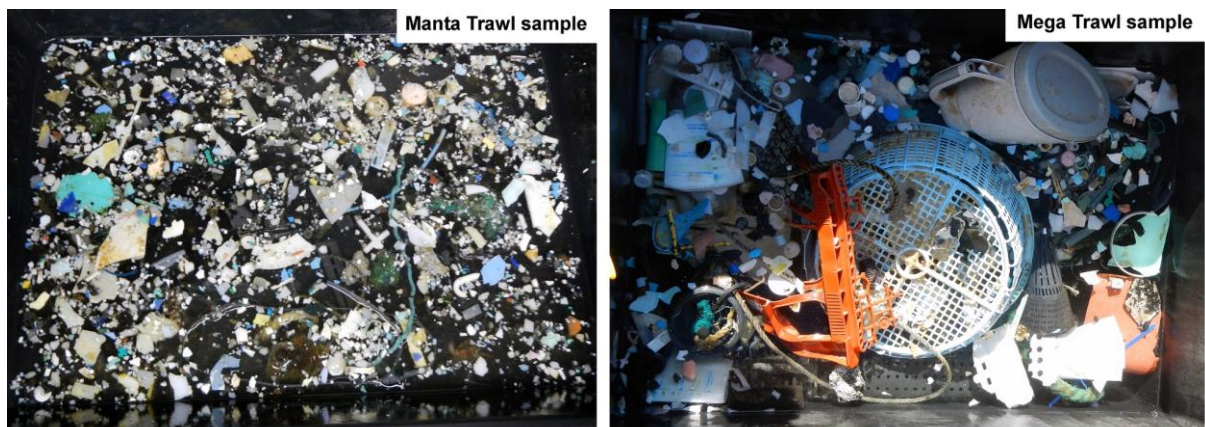

180

181 **Supplementary Figure 3: Example of Manta and Mega trawl samples analysed in this study.** Both samples  
182 shown here are unprocessed, therefore displaying the whole material collected by the trawl during a net tow  
183 within the GPGP area. Note the lack of  $> 5$  cm in the Manta sample, which yielded a zero-inflated distribution  
184 for concentrations of  $> 5$  cm ocean plastics for Manta trawl sampling.

185

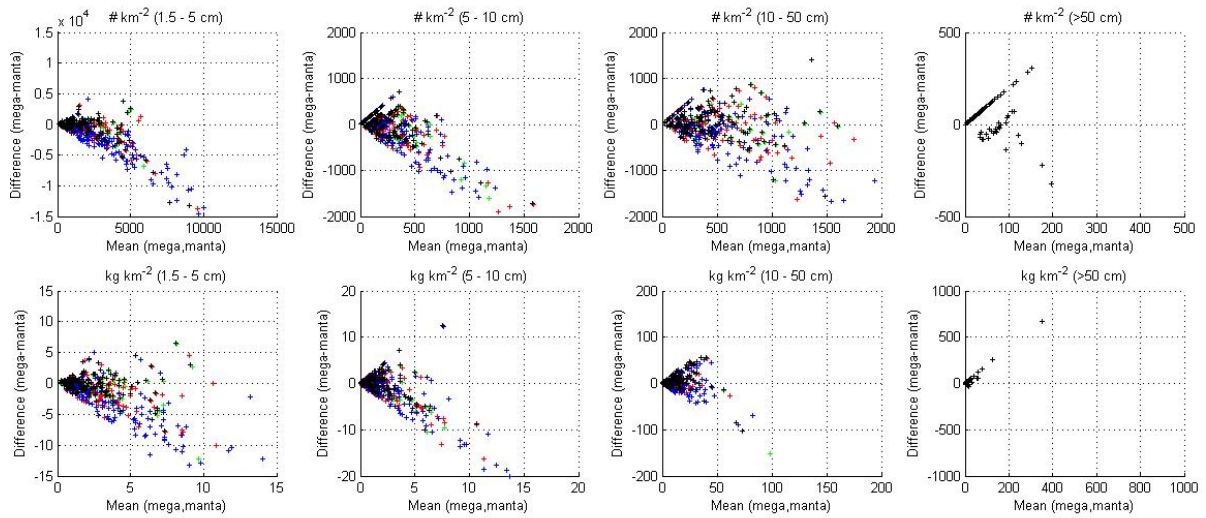

186

187 **Supplementary Figure 4: Bland-Altman analyses between Manta and Mega trawl sampling.** Ocean plastic

188 numerical (top) and mass (bottom) concentration differences between Mega and Manta trawls against

189 respectively mean numerical and mass concentration of the two methods per debris size classes for no depth-

190 integrated correction (black) and minimum (green), median (red) and maximum (blue) depth-integrated

191 concentrations.

192

### 193 **Supplementary Methods 3: Estimating mass concentration from aerial imagery**

194 To estimate ocean plastic mass concentrations within each of our 31 RGB mosaics, we had to  
195 first estimate the mass of the objects spotted individually. After this we separately summed  
196 the mass of the 10 - 50 cm and > 50 cm objects within each mosaic by the area covered.  
197 To estimate the mass of each object spotted on aerial imagery (Supplementary Figure 5), we  
198 measured dry weight and ‘top-view’ length and width of objects collected during trawl  
199 surveys that closely resembled the object types and sizes observed in the aerial footage. For  
200 footage debris of ‘unknown’ type, we took a conservative approach and used flat-shaped  
201 plastic fragments to estimate their weight. We then developed predictive functions for dry  
202 weight, based on the object’s type and top-view area. Top-view area for both objects in the  
203 laboratory and spotted in the aerial mosaics were calculated from nadir images. For ‘bundled  
204 nets’, we assumed that the top-view area was an ellipse; for ‘loose nets’, ‘ropes’, ‘containers’  
205 and ‘unknowns’, we multiplied length by width of the object; for ‘buoys/lids’, we assumed a  
206 perfect circle and calculated the surface area from the diameter; and for the only item  
207 categorised as ‘other’ – the life ring – we directly assigned a value by weighing a life ring  
208 with same characteristics and dimensions (collected in one of our net tows). To take the nadir  
209 photographs of the ‘bundled nets’ that we collected during the trawl surveys, we had to set-up  
210 tanks filled with seawater, so the resulting top-view surface area would better mimic their  
211 shape while floating at-sea. All other objects were placed on a table to estimate a  
212 conservative top-view surface area while floating at sea. As we found good correlations  
213 between top-view surface area and dry weight for different types of objects, we developed a  
214 series of predictive functions to estimate debris mass from its top-view area and type  
215 (Supplementary Figure 6). We defined a mid-point estimate as well as 95% CI that was used  
216 to build our plastic mass concentration confidence intervals. Naturally, the predictive  
217 functions for buoys and lids were different. In order to estimate the mass of sighted objects in

218 the ‘buoy/lid’ category, we weighted the contribution by assuming a 60% chance to the  
219 object being a buoy and a 40% chance being a lid. These contributions were calculated from  
220 the ratio of buoys and lids (>5 cm) collected in our Mega trawl samples.  
221 Due to the resolution limitation of the aerial images, likely leading to underestimations of 10  
222 - 50 cm debris concentrations (i.e. while mean mass concentrations for 10 - 50 cm debris  
223 coming from Mega trawl sampling was equal to 15.1 kg km<sup>-1</sup>, those coming from the aerial  
224 footage were equal to 1.1 kg km<sup>-1</sup>), we decided to only use the aerial footage concentration  
225 estimations for megaplastics (> 50 cm). Furthermore, we did not apply any type of vertical  
226 corrections to concentration estimates of debris larger than 50 cm as the estimated Beaufort  
227 sea state during aerial surveys was below 3.  
228

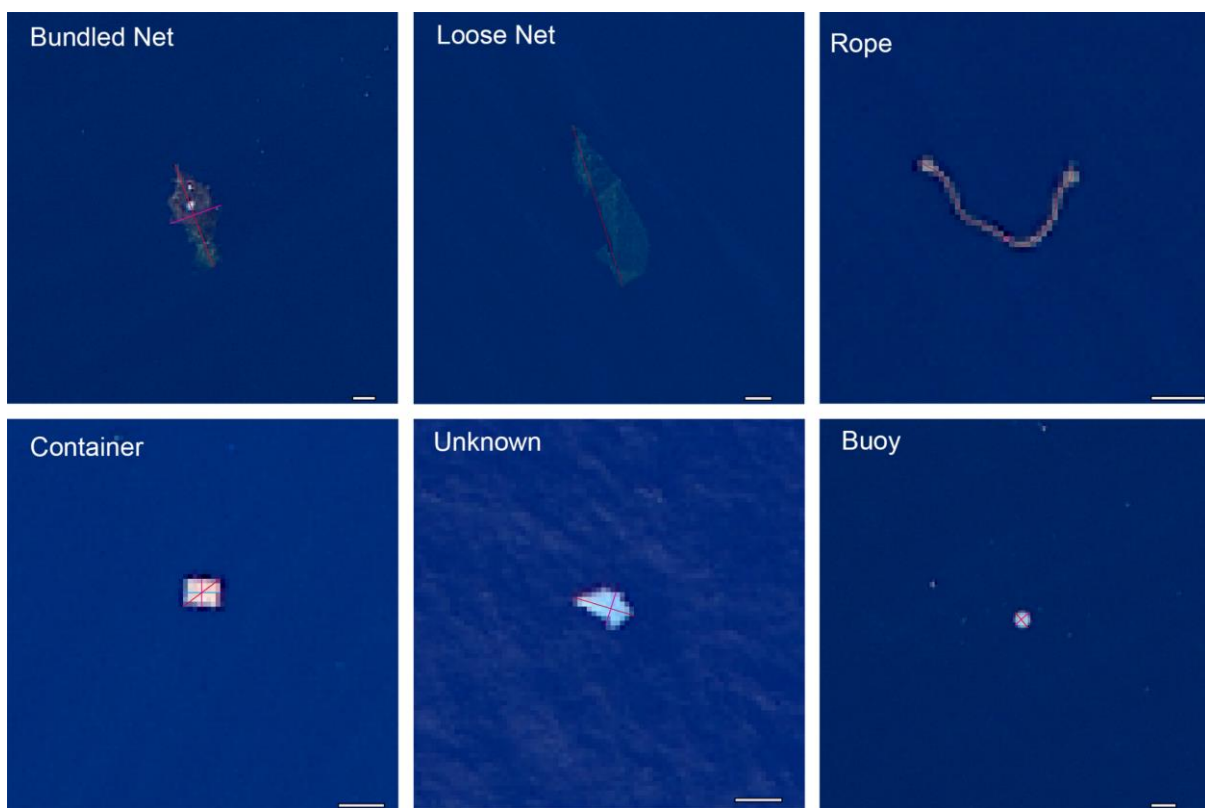

229  
230 **Supplementary Figure 5:** Examples of object types observed in the aerial mosaics. Colourful lines show some  
231 of the measurements taken. Scale = 1m.  
232

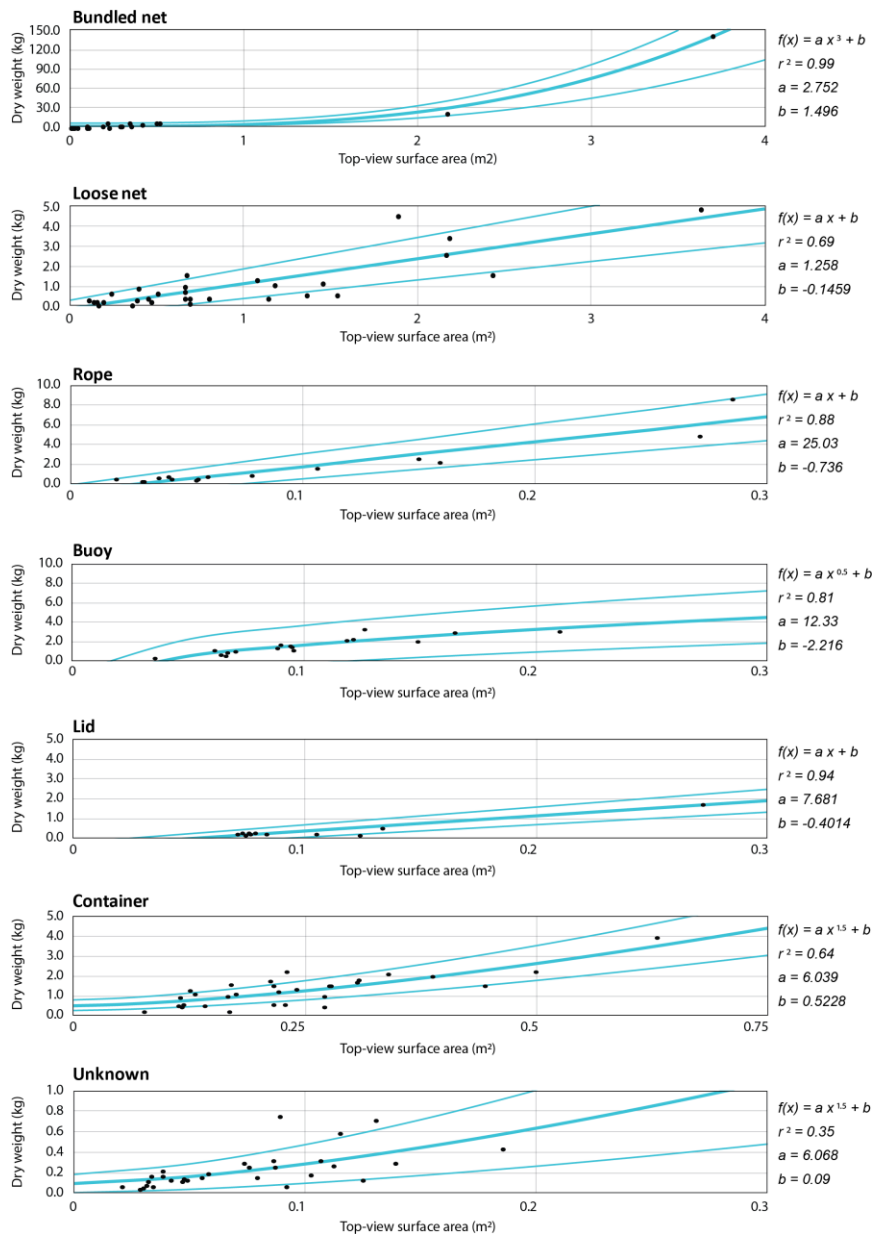

233

234 **Supplementary Figure 6. Predictive functions for plastic debris mass based on object type and top-view**

235 **area.** Midpoint (bold blue line) and lower/upper from 95 % CI (thin blue lines) are plotted against dry weight x

236 top-view area measurements of objects collected by the trawls of this study (black dots). Predictive functions for

237 the mass of objects used top-view surface area (x) and y is dry weight (y) as input variables. Initial intuitions on

238 power laws was attributed to each object type: we assumed dry weight varies linearly for flat objects (rope, lid

239 and loose net types), to the power of 3/2 (i.e. multiplied by its square roots) for three-dimensional objects

240 (container and unknown fragment types), cubically for bundled nets (representing increase of density from

241 increase in tightness of the nets and aggregation of debris) and by the square root for buoys (i.e. the dry weight

242 varies linearly with the radius of the buoy). The functions, r-square scores and coefficients are shown in the

243 right side of the panels.

#### 244 **Supplementary Methods 4: Modelled sources of ocean plastic**

245 The distribution and rate of particle releases in our ocean plastic dispersal model followed the  
246 estimated evolution of relevant ocean plastic source proxies (Supplementary Figure 7):  
247 mismanaged plastic waste in coastal areas, plastic inputs from rivers, and losses from fishing,  
248 aquaculture, and shipping industries. The five source scenarios represented 4,248,349  
249 particles released from 1993 to 2012. The coastal population (assumed to be within 50 km  
250 from the coastline) scenario was based on data from reported litter input estimates from land  
251 to the sea for 192 countries around the world <sup>8</sup>. We used country-specific estimates of  
252 mismanaged waste generation per inhabitant and per year along with global population  
253 density data. We computed the coastal population for individual countries using global 15 x  
254 15-minute population density grids based on IPCC SRES B2 scenario for the years 1990 and  
255 2025 <sup>9 10</sup> and interpolated using population growth rate based on country-level population and  
256 downscaled projections from 1993 to 2012 <sup>11</sup>. For the contribution of inland population  
257 (located >50 km from the sea), we used hydrographic model outputs from a global  
258 assessment quantifying plastic inputs from rivers <sup>12</sup>. We calculated the temporal evolution of  
259 releases from rivers from country-scale population growth data. Plastic waste inputs from the  
260 fishing industry were derived from global fishing hotspots. The source distribution was  
261 calculated from estimated fishing efforts data per year and per continental fleet <sup>13</sup>. The  
262 reported fishing efforts, expressed in kW-days year<sup>-1</sup>, was computed from catch statistics and  
263 fleets location for the period 1990-2006. Bell et al., 2012 <sup>14</sup> reports a breakdown of fishing  
264 capacity and effort, per country from 1950 to 2012 using data from the Food and Agriculture  
265 Organization of the United Nations (FAO) and other sources. Fishing effort distribution per  
266 continental fleets, computed by Watson et al., 2013 <sup>13</sup> was interpolated using the change rate  
267 of fishing efforts, calculated by Bell et al., 2012 <sup>14</sup> from 2006 to 2012. The distribution of  
268 ocean plastic waste generated by the aquaculture industry was built from aquaculture

269 production statistics per countries from the United Nation's Food and Agriculture  
270 Organisation (FAO<sup>15</sup>). In the FAO's database, aquaculture was categorised by inland  
271 aquaculture and mariculture, therefore we considered mariculture production data only. We  
272 are not aware of any existing spatial distribution of mariculture infrastructure at global scale.  
273 Thus, particles were randomly released inside the spatial overlap between the continental  
274 shelf (depth < 200 m,<sup>16</sup>) and each country's exclusive economic zone (EEZ). Finally, the  
275 global distribution of plastic sources from the shipping industry was based on gridded  
276 shipping frequency<sup>17</sup>. The increase in release rate was proportional to the size of global  
277 merchant shipping from 1993 to 2012<sup>18</sup>.

278 To account for differences in source amplitude, individual particles were attributed a non-  
279 dimensional weight based on global input estimates available in the literature for individual  
280 sources. For land-based sources (coastal and inland population), we used two global input  
281 estimates based on the consideration of mismanaged plastic waste and population density<sup>8 12</sup>.  
282 For marine-based sources (fishing, shipping and aquaculture), we used the average ratio  
283 between land- and marine-originated debris found on beaches<sup>19</sup>, and incorporated statistical  
284 data from European seas on potential marine-based source for collected debris items<sup>20 21</sup>. To  
285 estimate the relative source contribution ranges in percentage of total yearly input, we  
286 considered lower (resp. higher) input estimate when all other sources were taken at higher  
287 (resp. lower) input estimates. For marine-based sources, the lower and higher input rates were  
288 taken from the lower and upper limits of the two global input estimates that were considered  
289 for this calculation. The midpoint contributions used to merge our global source scenarios  
290 were calculated from the average of lower and upper contribution ranges, then normalized to  
291 sum to 100%. Using midpoint relative contribution averages, we calculated that, at global  
292 scale, 71.9% of plastic debris originate from land-based sources and 28.1% from direct input  
293 at sea (see Supplementary Table 6).



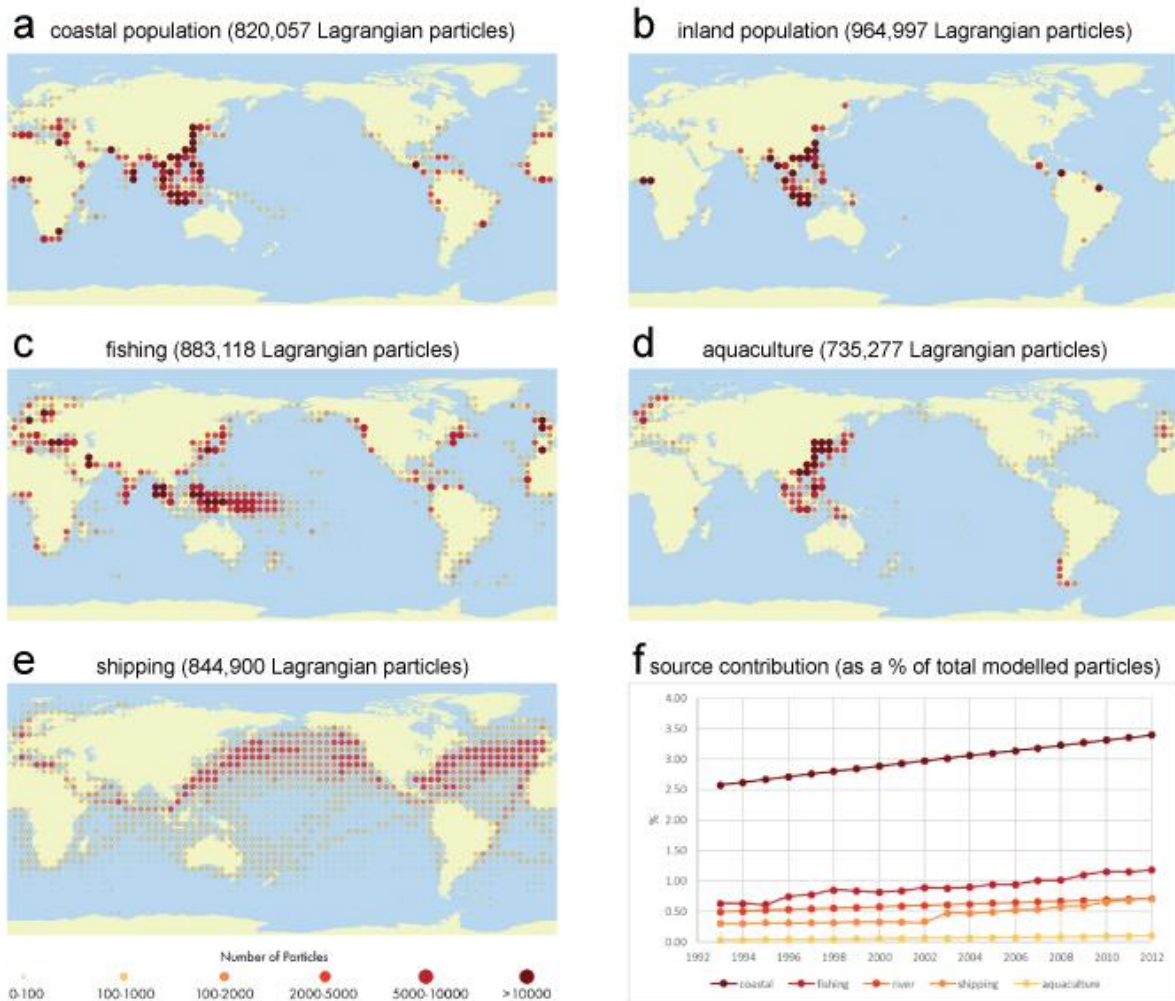

295

296 **Supplementary Figure 7: Lagrangian particle source distribution used in the global dispersal model.**

297 Land-based sources (a & b) are derived from mismanaged waste distribution <sup>8</sup> and plastic river inputs <sup>27</sup>.

298 Marine-based sources are representative of fishing effort (c) <sup>13</sup>, aquaculture production (d) <sup>15</sup>, and shipping

299 frequency (e) <sup>17</sup>. Particles are continuously released from 1993 to 2012 at a yearly rate proportional to respective

300 source proxies (f). Maps were created using QGIS version 2.18.1 ([www.qgis.org](http://www.qgis.org)).

301

302

303

## 304 **Supplementary Methods 5: Resolving the temporal variability of the GPGP position**

305 We sampled the GPGP between 2015 and 2016 while our ocean plastic model extends from  
306 1993 to 2012. To overcome this issue while accounting for seasonal and inter-annual changes  
307 in the GPGP position, we had to search for years in our model reanalysis presenting similar  
308 climatic conditions to those experienced during the sampling campaigns. To do so, we first  
309 computed the monthly barycentric position of non-dimensional concentration (i.e. mass  
310 centre of particle cloud, called GPGP centre thereafter) for the 2000 to 2012 period and all  
311 forcing scenarios of this study. Earlier years were not used to allow our model domain to  
312 sufficiently accumulate particles, so we could draw reliable contours. We extracted the  
313 latitudes and longitudes of the GPGP centre and compared them with two climate indexes  
314 (Supplementary Figure 8): The El Niño–Southern Oscillation (ENSO) and the Pacific  
315 Decadal Oscillation (PDO). When considering the null windage scenario, the ENSO index  
316 showed a statistically significant correlation with both predicted longitude ( $R = 0.35$ ,  $p <$   
317  $0.001$ ,  $n = 156$ ) and latitude positions ( $R = 0.26$ ,  $p = 0.0011$ ,  $n = 156$ ) of the GPGP centre.  
318 The PDO index showed a better correlation ( $R = 0.71$ ,  $p < 0.001$ ,  $n = 156$ ) with the longitude  
319 of the GPGP centre than ENSO; however, it did not demonstrate a statistically significant  
320 correlation with the latitudinal position ( $R = 0.13$ ,  $p = 0.097$ ,  $n = 156$ ). A positive correlation  
321 between ENSO and model-predicted latitudinal position suggests the GPGP is located at  
322 higher latitudes during La Niña phases (ENSO positive) and inversely for El Niño phases  
323 (ENSO negative). A positive correlation between longitude and PDO suggests that the GPGP  
324 is located to the west during PDO negative phase and to the east during PDO positive phase.  
325 Our model results exhibited this phenomenon with two noticeable shifts in longitudinal  
326 positions in 2003 and 2010, followed by a significant drop in latitudinal position the  
327 following months.

328 Our trawl surveys occurred in July - September 2015, just before a strong La Niña phase  
329 (ENSO positive), and our aerial surveys occurred in September - October 2016, just after this  
330 La Niña peak (ENSO negative). During our model reanalysis, four significant La Niña events  
331 occurred: in 2002 - 2003, 2004 - 2005, 2006 - 2007 and 2009 – 2010 (see Supplementary  
332 Figure 8a). The PDO index was also positive for our 2015 trawl surveys and negative for our  
333 2016 aerial surveys, with a PDO peak in between these two expeditions. Of the four La Niña  
334 events identified above, only the first two presented similar PDO variations to those  
335 experienced during our July 2015- October 2016 sampling period (see Supplementary Figure  
336 8b). As such, we concluded that the GPGP position during our expeditions would be best  
337 described with model results for the 2002-2003 and 2004-2005 periods highlighted with grey  
338 boxes in both panels of Supplementary Figure 8. Therefore, we used three-monthly averages  
339 from July-September 2002 and July-September 2004 to calibrate our model against trawl data  
340 and three-monthly averages from September-November 2003 and September-November  
341 2005 to calibrate our model against aerial imagery data.

342

343

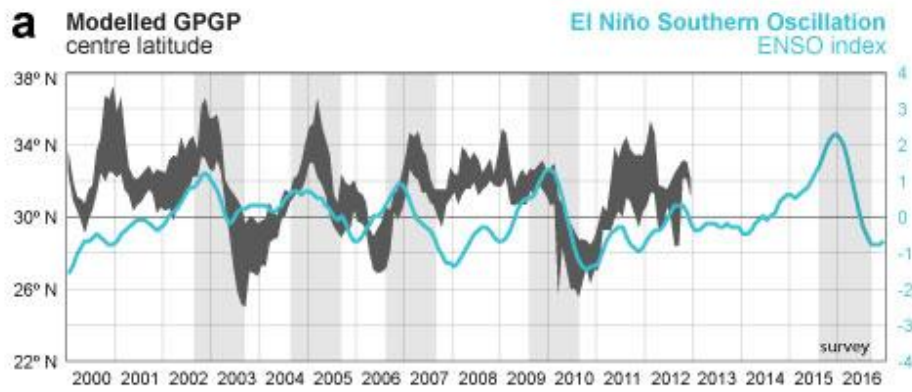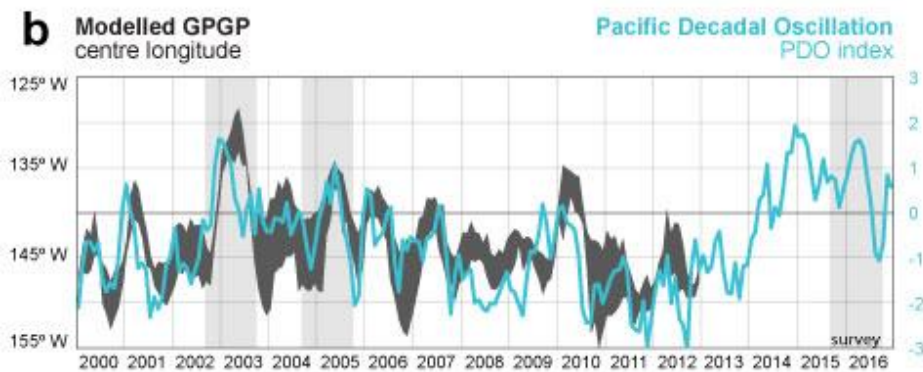

344

345 **Supplementary Figure 8: Temporal variability of the GPGP centre position.** a) Modelled GPGP centre  
 346 latitude range (thick dark grey line) against the El Niño Southern Oscillation (ENSO) index (blue line). We  
 347 conducted our surveys before and after a significant la Niña phase (ENSO positive). Four similar events (ENSO  
 348 positive) starting in 2002, 2004, 2006, 2009 occurred during our model reanalysis period (1999 – 2012). b)  
 349 Modelled GPGP centre longitude range (thick dark grey line) against the Pacific Decadal Oscillation (PDO)  
 350 index (blue line). The PDO index transitioned from positive to negative with a likely shift of the GPGP from  
 351 east to west as predicted for similar events (2002 and 2004) in our model reanalysis.

352

353 **Supplementary Methods 6: Identifying historical samples collected inside the GPGP**

354 Our ocean plastic model covered the 1993 - 2012 period. It took about six years for released  
355 particles to significantly accumulate in the GPGP so that we could draw a clear boundary for  
356 this region. Once a boundary was established, we could follow it in time and assess whether a  
357 sample was collected inside or outside the GPGP. Samples collected before 1993 were  
358 compared against the GPGP position estimated from years in the 1999 - 2012 period that  
359 showed similar environmental conditions regarding ENSO and PDO indexes (Supplementary  
360 Figure 9). Concentration data reported before 1993 included measurements in 1972, 1973 <sup>22</sup>  
361 <sup>23</sup>, 1976 <sup>24</sup>, and 1985 <sup>25</sup>. The 1972 - 1973 period experienced a similar ENSO event than  
362 during our 2015 - 2016 sampling interval: a strong La Niña phase in the first year, followed  
363 by a rapid shift to El Niño during the second year. However, the PDO index was negative  
364 whereas it was mostly positive during our 2015 – 2016 expeditions. The period 2006 - 2007  
365 and 2009 - 2010 also depicted a strong La Niña to El Niño shift with negative PDO index.  
366 Therefore, the average position of the GPGP for these years were compared with samples  
367 taken between 1972 and 1973. Similarly, samples collected in 1976 (entering La Niña phase  
368 and PDO negative) were compared against the GPGP position predicted respectively for 2002  
369 (entering La Niña phase and PDO negative). As no similar conditions than those experienced  
370 in 1985 (two consecutive years of ENSO index near null) were found during our timeseries  
371 we conservatively took the 12-year average to estimate the GPGP position for this year. The  
372 uncertainties related to detecting microplastics sampling stations occurring inside the GPGP  
373 for years previous to 1999 are reflected in the relatively wide confidence intervals presented  
374 in Figure 6 of the main manuscript for these decades.

375

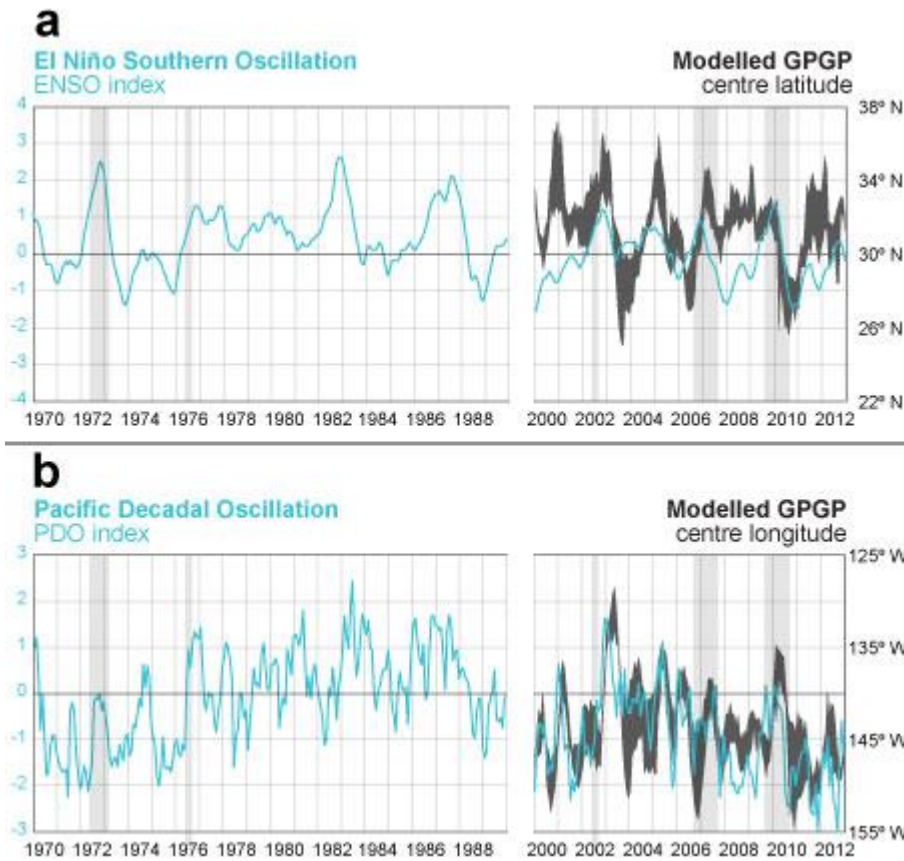

376

377 **Supplementary Figure 9: Climate indexes correlation with the GPGP position for the historical dataset**

378 **analysis.** a) Modelled GPGP centre latitude range (thick dark grey line) against the El Niño Southern Oscillation

379 (ENSO) index (blue line). b) Modelled GPGP centre longitude range (thick grey line) against the Pacific

380 Decadal Oscillation (PDO) index (blue line). We used climatic indexes of periods when net tow data was

381 collected (1972, 1973, and 1976; shown as light grey boxes in the left panels) outside years covered by the

382 model reanalysis period (1999 – 2012) to find similar environmental conditions.

383

384 **SUPPLEMENTARY TABLES**

385

| Size Class (cm) | Type H |        | Type N |        | Type P |       | Type F |       |
|-----------------|--------|--------|--------|--------|--------|-------|--------|-------|
|                 | mass   | count  | mass   | count  | mass   | count | mass   | count |
| 0.05 -0.15      | 96.17% | 94.14% | 3.79%  | 5.82%  | 0.00%  | 0.00% | 0.03%  | 0.04% |
| 0.15 - 0.5      | 92.74% | 88.59% | 1.42%  | 7.78%  | 5.82%  | 3.55% | 0.03%  | 0.09% |
| 0.5 - 1.5       | 96.67% | 81.36% | 3.26%  | 18.51% | 0.02%  | 0.05% | 0.05%  | 0.08% |
| 1.5 - 5         | 91.31% | 65.12% | 8.59%  | 34.52% | 0.00%  | 0.00% | 0.10%  | 0.35% |
| 5 - 10          | 94.02% | 76.05% | 5.94%  | 23.78% | 0.00%  | 0.00% | 0.04%  | 0.17% |
| 10 - 50         | 92.12% | 61.93% | 7.75%  | 37.91% | 0.00%  | 0.00% | 0.13%  | 0.16% |
| > 50            | 7.60%  | 60.02% | 92.40% | 39.98% | 0.00%  | 0.00% | 0.00%  | 0.00% |

386

387 **Supplementary Table 1. Mass and count contributions of ocean plastic types to the total mass and count**

388 **of the size classes considered in this study.** Type H include pieces of hard plastic, plastic sheet and film, type

389 N encompasses plastic lines, ropes and fishing nets, type P are pre-production plastic pellets, and type F are

390 pieces made of foamed material.

391

392

| Sampling Year | Data Reference                      | Net Type     | Reported units     | # within (around) NPGP |
|---------------|-------------------------------------|--------------|--------------------|------------------------|
|               |                                     | Ring net     | # m <sup>-3</sup>  |                        |
| 1972          | Goldstein et al. 2012 <sup>22</sup> | 0.5 mm mesh  | mg m <sup>-3</sup> | 8 (23)                 |
|               |                                     | Neuston      | mg m <sup>-2</sup> |                        |
| 1972          | Wong et al. 1974 <sup>23</sup>      | 0.15 mm mesh |                    | 8 (25)                 |
|               |                                     | Neuston      | # m <sup>-2</sup>  |                        |
| 1973          | Goldstein et al. 2012 <sup>22</sup> | 0.5 mm       | mg m <sup>-2</sup> | 4 (10)                 |
|               |                                     | Ring net     | mg m <sup>-2</sup> |                        |
| 1976          | Shaw & Mapes 1979 <sup>24</sup>     | 0.33 mm      |                    | 0 (19)                 |
|               |                                     | Ring net     | mg m <sup>-2</sup> |                        |
| 1985          | Day & Shaw 1987 <sup>25</sup>       | 0.33 mm      |                    | 4 (2)                  |
|               |                                     | Manta        | # m <sup>-2</sup>  |                        |
| 1999          | Moore et al. 2001 <sup>26</sup>     | 0.33 mm      | mg m <sup>-2</sup> | 2 (8)                  |
|               |                                     | Neuston      | # km <sup>-2</sup> |                        |
| 2001 - 2004   | Law et al. 2014 <sup>2</sup>        | 0.33 mm      |                    | 0 (244)                |
|               |                                     | Neuston      | # km <sup>-2</sup> |                        |
| 2005 - 2012   | Law et al. 2014 <sup>2</sup>        | 0.33 mm      |                    | 70 (680)               |
|               |                                     | Manta        | # km <sup>-2</sup> |                        |
| 2007 - 2012   | Eriksen et al. 2014 <sup>3</sup>    | 0.33 mm      | g km <sup>-2</sup> | 29 (114)               |
|               |                                     | Manta        | # m <sup>-3</sup>  |                        |
| 2009 - 2011   | Goldstein et al. 2012 <sup>22</sup> | 0.33 mm      | mg m <sup>-3</sup> | 96 (67)                |
|               |                                     | Manta        | # km <sup>-2</sup> |                        |
| 2015          | This Study                          | 0.5 mm       | g km <sup>-2</sup> | 288 (213)              |

393

394 **Supplementary Table 2: Historical microplastic concentration dataset.** Information related to the plankton  
395 net tows considered in our plastic pollution temporal trend analysis for areas within and around the GPGP.

396 White and grey cells show data that were pooled together to represent the following time periods: 1965-1974,

397 1975-1984, 1985-1994, 1995-2004, 2005-2014, and 2015-present.

398

399



| Size Class (cm) | Type H               | Type N                          | Type P  | Type F                                               |
|-----------------|----------------------|---------------------------------|---------|------------------------------------------------------|
| 0.05 -0.15      | 90% PE<br>10% PP     | 60% PE<br>40% PP                | -       | 10% PE<br>70% PS<br>20% NA                           |
| 0.15 - 0.5      | 100% PE              | 40% PE<br>60% PP                | 100% PE | 50% PE<br>50% PS                                     |
| 0.5 - 1.5       | 80% PE<br>20% PP     | 60% PE<br>40% PP                | 100% PE | 30% PE<br>10% PP<br>40% PS<br>10% PVC<br>10% NA      |
| 1.5 - 5         | 70% PE<br>30% PP     | 80% PE<br>20% PP                | -       | 50% PE<br>40% PS<br>10% PVC                          |
| 5 - 10          | 60% PE<br>40% PP     | 80% PE<br>20% PP                | -       | 30% PE<br>10% PP<br>30% PS<br>10% PVC<br>20% NA      |
| 10 - 50         | 50% PE<br>50% PP     | 50% PE<br>50% PP                | -       | 70% PE<br>10% PVC<br>20% NA                          |
| > 50            | 60% PE<br>40% PP     | 80% PE<br>10% PP<br>10% NA      | -       | -                                                    |
| All             | 72.9% PE<br>27.1% PP | 64.3% PE<br>34.3% PP<br>1.4% NA | 100% PE | 40% PE<br>3.3% PP<br>38.3% PS<br>6.7% PVC<br>11.7 NA |

400

401 **Supplementary Table 3: Polymer types per ocean plastic type and size within the GPMP.** Plastic type H  
402 include pieces of hard plastic, plastic sheet and film, type N encompasses plastic lines, ropes and fishing nets,  
403 type P are pre-production plastic pellets, and type F are pieces made of foamed material. PE = polyethylene, PP  
404 = polypropylene, PS = polystyrene, PVC = polyvinyl chloride, NA = unknown. Percentages are frequencies of  
405 occurrence using 10 pieces per type/size category.

406

| Size Class (cm) | Type H                                                                                                                  | Type N                                     |
|-----------------|-------------------------------------------------------------------------------------------------------------------------|--------------------------------------------|
| 0.15 - 0.5      | hard plastic fragments (99.6%) film fragments (0.4%)                                                                    | lines (57.8%), ropes (40.8%), nets (1.4%)  |
| 0.5 - 1.5       | hard plastic fragments (96.5%), melted plastic (0.8%), film fragments (0.7%), oyster spacers (0.5%), bottle lids (0.4%) | lines (56.1%), ropes (42.7%), nets (1.1%)  |
| 1.5 - 5         | hard plastic fragments (75.3%), oyster spacers (6.3%), bottle lids (4.8%), container lids (2.9%), melted plastic (2.4%) | ropes (65.5%), lines (33.9%), nets (0.5%)  |
| 5 - 10          | hard plastic fragments (63.4%), bottles (8.8%), container lids (7.2%), containers (5.6%), oyster spacers (2.5%)         | ropes (80.7%), lines (17.6%), nets (1.7%)  |
| 10 - 50         | hard plastic fragments (43.1%), containers (11.1%), trap cones (10.6%), oyster spacers (10.3%), bottles (6.4%)          | ropes (89.5%), lines (6%), nets (4.5%)     |
| > 50            | hard plastic fragments (37.5%), packaging straps (20.6%), containers (10.3%), film fragments (10.3%), tubes (9.3%)      | ropes (86.7%), nets (12.7%), lines (0.5%), |
| All             | hard plastic fragments (98.2%), film fragments (0.4%), oyster spacers (0.2%), containers (0.2%), bottles (0.1%)         | ropes (51.0%), lines (47.1%), nets (1.9%)  |

407 \* Only the top 5 object types by frequency of occurrence are shown. If less than 5 types are provided, it is because the respective size/type  
408 category has less than 5 object types.

409

410 **Supplementary Table 4: Frequency occurrence (%) of different plastic objects within size classes of the**  
411 **most common ocean plastic types of this study.** Plastic type H include pieces of hard plastic, plastic sheet and  
412 film, type N encompasses plastic lines, ropes and fishing nets.

413

| <b>Identified languages</b> | <b>Identified country of production</b> |
|-----------------------------|-----------------------------------------|
| Japanese (115)              | Japan (14)                              |
| Chinese (113)               | Mexico (8)                              |
| Korean (65)                 | Taiwan (5)                              |
| English (49)                | China (4)                               |
| Spanish (33)                | Philippines (3)                         |
| French (2)                  | Canada (1)                              |
| Vietnamese (2)              | Chile (1)                               |
| German (1)                  | Colombia (1)                            |
| Portuguese (1)              | Germany (1)                             |
| Dutch (1)                   | Italy (1)                               |
| Russian (1)                 | Korea (1)                               |
|                             | Venezuela (1)                           |

414

415 **Supplementary Table 5: Identified languages and countries of production in plastics collected within the**  
416 **GPGP.** The number of objects with recognizable language and/or country of production ('made in' label) is  
417 given in parenthesis.

418

| Sources            | Global input<br>(in million tonnes year <sup>-1</sup> ) | Comments                                                                                                                                                                                                                                                                                                          | Midpoint relative source<br>contribution ( $\alpha_s$ ) |
|--------------------|---------------------------------------------------------|-------------------------------------------------------------------------------------------------------------------------------------------------------------------------------------------------------------------------------------------------------------------------------------------------------------------|---------------------------------------------------------|
| Coastal population | 4.8 - 12.7                                              | Based on Jambeck et al. 2015 <sup>8</sup> considering input from mismanaged plastic waste produced by coastal population (<50 km from coastline)                                                                                                                                                                  | <b>59.8%</b>                                            |
| Inland population  | 0.72 - 1.52                                             | Based on river inputs from Lebreton et al. (2017) <sup>12</sup> , considering inputs from inland population (>50 km) and catchments hydrology.                                                                                                                                                                    | <b>12.1%</b>                                            |
| Fishing            | 0.29 - 3.5                                              | Based on International Coastal Cleanup (ICC) survey data <sup>19</sup> and European average distributions of marine-based sources in Arcadis 2012 <sup>20</sup> . Assuming 95.4% of emissions in 'Fishing sector' in Eunomia 2016 <sup>21</sup> comes from direct fishing activities (recreational or commercial) | <b>17.9%</b>                                            |
| Aquaculture        | 0.014 - 0.17                                            | Based on International Coastal Cleanup (ICC) survey data <sup>19</sup> and European average distributions of marine-based sources in Arcadis 2012 <sup>20</sup> . Assuming 4.6% of emissions in 'Fishing sector' in Eunomia 2016 <sup>21</sup> comes from aquaculture.                                            | <b>1.3%</b>                                             |
| Shipping           | 0.1 - 1.4                                               | Based on International Coastal Cleanup (ICC) survey data <sup>19</sup> and European average distributions of marine-based sources in Arcadis 2012 <sup>20</sup> .                                                                                                                                                 | <b>8.9%</b>                                             |

419

420 **Supplementary Table 6: Global estimates of annual inputs from sources considered in this study.**

421 Midpoint relative source contribution ( $\alpha_s$ ) are calculated from median and uniformized to have the five source  
422 contributions summing to 100 %.

423

|                 | Beaufort 0<br>0 knots (0-0) |   |   | Beaufort 1<br>2 knots (1-3) |   |   | Beaufort 2<br>5 knots (4 - 6) |     |   | Beaufort 3<br>9 knots (7 - 10) |     |     | Beaufort 4<br>13 knots (11-16) |     |     | Beaufort 5<br>19 knots (17-21) |     |     |
|-----------------|-----------------------------|---|---|-----------------------------|---|---|-------------------------------|-----|---|--------------------------------|-----|-----|--------------------------------|-----|-----|--------------------------------|-----|-----|
|                 | L                           | M | H | L                           | M | H | L                             | M   | H | L                              | M   | H   | L                              | M   | H   | L                              | M   | H   |
| <b>Type 'H'</b> |                             |   |   |                             |   |   |                               |     |   |                                |     |     |                                |     |     |                                |     |     |
| 0.05 - 0.15     | 1                           | 1 | 1 | 1                           | 1 | 1 | 0.9                           | 1   | 1 | 0.4                            | 0.7 | 1   | 0.1                            | 0.3 | 0.5 | 0.1                            | 0.1 | 0.2 |
| 0.15 - 0.5      | 1                           | 1 | 1 | 1                           | 1 | 1 | 1                             | 1   | 1 | 0.7                            | 0.9 | 1   | 0.2                            | 0.5 | 0.7 | 0.1                            | 0.2 | 0.3 |
| 0.5 - 1.5       | 1                           | 1 | 1 | 1                           | 1 | 1 | 1                             | 1   | 1 | 0.8                            | 1   | 1   | 0.3                            | 0.7 | 0.9 | 0.2                            | 0.3 | 0.5 |
| 1.5 - 5         | 1                           | 1 | 1 | 1                           | 1 | 1 | 1                             | 1   | 1 | 0.8                            | 1   | 1   | 0.3                            | 0.7 | 1   | 0.2                            | 0.3 | 0.6 |
| 5 - 10          | 1                           | 1 | 1 | 1                           | 1 | 1 | 1                             | 1   | 1 | 0.9                            | 1   | 1   | 0.4                            | 0.8 | 1   | 0.2                            | 0.4 | 0.6 |
| 10 - 50         | 1                           | 1 | 1 | 1                           | 1 | 1 | 1                             | 1   | 1 | 1                              | 1   | 1   | 0.6                            | 0.9 | 1   | 0.3                            | 0.5 | 0.7 |
| > 50 cm         | 1                           | 1 | 1 | 1                           | 1 | 1 | 1                             | 1   | 1 | 1                              | 1   | 1   | 0.7                            | 0.9 | 1   | 0.4                            | 0.6 | 0.8 |
| <b>Type 'N'</b> |                             |   |   |                             |   |   |                               |     |   |                                |     |     |                                |     |     |                                |     |     |
| 0.05 - 0.15     | 1                           | 1 | 1 | 1                           | 1 | 1 | 0.7                           | 0.9 | 1 | 0.2                            | 0.3 | 0.7 | 0.1                            | 0.1 | 0.3 | 0                              | 0   | 0.1 |
| 0.15 - 0.5      | 1                           | 1 | 1 | 1                           | 1 | 1 | 0.8                           | 1   | 1 | 0.3                            | 0.4 | 0.8 | 0.1                            | 0.2 | 0.3 | 0                              | 0.1 | 0.1 |
| 0.5 - 1.5       | 1                           | 1 | 1 | 1                           | 1 | 1 | 1                             | 1   | 1 | 0.5                            | 0.9 | 1   | 0.2                            | 0.5 | 0.8 | 0.1                            | 0.2 | 0.4 |
| 1.5 - 5         | 1                           | 1 | 1 | 1                           | 1 | 1 | 1                             | 1   | 1 | 0.8                            | 1   | 1   | 0.3                            | 0.7 | 1   | 0.2                            | 0.3 | 0.6 |
| 5 - 10          | 1                           | 1 | 1 | 1                           | 1 | 1 | 1                             | 1   | 1 | 0.8                            | 0.9 | 1   | 0.3                            | 0.6 | 0.9 | 0.2                            | 0.2 | 0.4 |
| 10 - 50         | 1                           | 1 | 1 | 1                           | 1 | 1 | 1                             | 1   | 1 | 0.9                            | 1   | 1   | 0.4                            | 0.8 | 1   | 0.2                            | 0.4 | 0.6 |
| > 50 cm         | 1                           | 1 | 1 | 1                           | 1 | 1 | 1                             | 1   | 1 | 1                              | 1   | 1   | 0.6                            | 0.9 | 1   | 0.3                            | 0.5 | 0.8 |
| <b>Type 'P'</b> |                             |   |   |                             |   |   |                               |     |   |                                |     |     |                                |     |     |                                |     |     |
| 0.15 - 0.5      | 1                           | 1 | 1 | 1                           | 1 | 1 | 1                             | 1   | 1 | 0.9                            | 1   | 1   | 0.4                            | 0.7 | 0.9 | 0.2                            | 0.3 | 0.5 |
| 0.5 - 1.5 cm    | 1                           | 1 | 1 | 1                           | 1 | 1 | 1                             | 1   | 1 | 1                              | 1   | 1   | 0.6                            | 0.9 | 1   | 0.3                            | 0.5 | 0.7 |
| <b>Type 'F'</b> |                             |   |   |                             |   |   |                               |     |   |                                |     |     |                                |     |     |                                |     |     |
| 0.05 - 0.15     | 1                           | 1 | 1 | 1                           | 1 | 1 | 0.7                           | 0.9 | 1 | 0.2                            | 0.3 | 0.7 | 0.1                            | 0.1 | 0.3 | 0                              | 0   | 0.1 |
| 0.15 - 0.5      | 1                           | 1 | 1 | 1                           | 1 | 1 | 0.8                           | 1   | 1 | 0.3                            | 0.4 | 0.8 | 0.1                            | 0.2 | 0.3 | 0                              | 0.1 | 0.1 |
| 0.5 - 1.5       | 1                           | 1 | 1 | 1                           | 1 | 1 | 1                             | 1   | 1 | 0.5                            | 0.9 | 1   | 0.2                            | 0.5 | 0.8 | 0.1                            | 0.2 | 0.4 |
| 1.5 - 5         | 1                           | 1 | 1 | 1                           | 1 | 1 | 1                             | 1   | 1 | 0.8                            | 1   | 1   | 0.3                            | 0.7 | 1   | 0.2                            | 0.3 | 0.6 |
| 5 - 10          | 1                           | 1 | 1 | 1                           | 1 | 1 | 1                             | 1   | 1 | 0.8                            | 0.9 | 1   | 0.3                            | 0.6 | 0.9 | 0.2                            | 0.2 | 0.4 |
| 10 - 50 cm      | 1                           | 1 | 1 | 1                           | 1 | 1 | 1                             | 1   | 1 | 0.9                            | 1   | 1   | 0.4                            | 0.8 | 1   | 0.2                            | 0.4 | 0.6 |

424

425 **Supplementary Table 7: Vertical correction for Manta trawl.** Low (L), mid (M) and high (H) vertical  
426 correction factor  $C_s/C_i$  for Manta trawl (sampling depth  $d = 0.15$  m) per sea state and type/size categories of  
427 plastic objects. The median correction factor was calculated using the equation from Kukulka et al. 2012<sup>1</sup> with  
428 the median  $Wb$  of a size/type category and the mean sea surface wind speed relative to a sea state category. The  
429 low (resp. high) values were calculated with the 25<sup>th</sup> (resp. 75<sup>th</sup>) percentile of  $Wb$  and the upper (resp. lower) end  
430 value of sea surface wind speed relative to a sea state category.

|                 | Beaufort 0<br>0 knots (0-0) |   |   | Beaufort 1<br>2 knots (1-3) |   |   | Beaufort 2<br>5 knots (4 - 6) |   |   | Beaufort 3<br>9 knots (7 - 10) |     |   | Beaufort 4<br>13 knots (11-16) |     |     | Beaufort 5<br>19 knots (17-21) |     |     |
|-----------------|-----------------------------|---|---|-----------------------------|---|---|-------------------------------|---|---|--------------------------------|-----|---|--------------------------------|-----|-----|--------------------------------|-----|-----|
|                 | L                           | M | H | L                           | M | H | L                             | M | H | L                              | M   | H | L                              | M   | H   | L                              | M   | H   |
| <b>Type 'H'</b> |                             |   |   |                             |   |   |                               |   |   |                                |     |   |                                |     |     |                                |     |     |
| 0.05 - 0.15     | 1                           | 1 | 1 | 1                           | 1 | 1 | 1                             | 1 | 1 | 1                              | 1   | 1 | 0.6                            | 0.9 | 1   | 0.3                            | 0.6 | 0.7 |
| 0.15 - 0.5      | 1                           | 1 | 1 | 1                           | 1 | 1 | 1                             | 1 | 1 | 1                              | 1   | 1 | 0.8                            | 1   | 1   | 0.5                            | 0.7 | 0.9 |
| 0.5 - 1.5       | 1                           | 1 | 1 | 1                           | 1 | 1 | 1                             | 1 | 1 | 1                              | 1   | 1 | 0.9                            | 1   | 1   | 0.7                            | 0.9 | 1   |
| 1.5 - 5         | 1                           | 1 | 1 | 1                           | 1 | 1 | 1                             | 1 | 1 | 1                              | 1   | 1 | 0.9                            | 1   | 1   | 0.7                            | 0.9 | 1   |
| 5 - 10          | 1                           | 1 | 1 | 1                           | 1 | 1 | 1                             | 1 | 1 | 1                              | 1   | 1 | 1                              | 1   | 1   | 0.8                            | 1   | 1   |
| 10 - 50         | 1                           | 1 | 1 | 1                           | 1 | 1 | 1                             | 1 | 1 | 1                              | 1   | 1 | 1                              | 1   | 1   | 0.9                            | 1   | 1   |
| > 50 cm         | 1                           | 1 | 1 | 1                           | 1 | 1 | 1                             | 1 | 1 | 1                              | 1   | 1 | 1                              | 1   | 1   | 1                              | 1   | 1   |
| <b>Type 'N'</b> |                             |   |   |                             |   |   |                               |   |   |                                |     |   |                                |     |     |                                |     |     |
| 0.05 - 0.15     | 1                           | 1 | 1 | 1                           | 1 | 1 | 1                             | 1 | 1 | 0.8                            | 0.9 | 1 | 0.3                            | 0.6 | 0.9 | 0.2                            | 0.3 | 0.4 |
| 0.15 - 0.5      | 1                           | 1 | 1 | 1                           | 1 | 1 | 1                             | 1 | 1 | 0.9                            | 1   | 1 | 0.4                            | 0.7 | 0.9 | 0.2                            | 0.3 | 0.5 |
| 0.5 - 1.5       | 1                           | 1 | 1 | 1                           | 1 | 1 | 1                             | 1 | 1 | 1                              | 1   | 1 | 0.7                            | 0.9 | 1   | 0.4                            | 0.7 | 1   |
| 1.5 - 5         | 1                           | 1 | 1 | 1                           | 1 | 1 | 1                             | 1 | 1 | 1                              | 1   | 1 | 0.9                            | 1   | 1   | 0.7                            | 0.9 | 1   |
| 5 - 10          | 1                           | 1 | 1 | 1                           | 1 | 1 | 1                             | 1 | 1 | 1                              | 1   | 1 | 0.9                            | 1   | 1   | 0.7                            | 0.8 | 1   |
| 10 - 50         | 1                           | 1 | 1 | 1                           | 1 | 1 | 1                             | 1 | 1 | 1                              | 1   | 1 | 1                              | 1   | 1   | 0.8                            | 1   | 1   |
| > 50 cm         | 1                           | 1 | 1 | 1                           | 1 | 1 | 1                             | 1 | 1 | 1                              | 1   | 1 | 1                              | 1   | 1   | 0.9                            | 1   | 1   |
| <b>Type 'P'</b> |                             |   |   |                             |   |   |                               |   |   |                                |     |   |                                |     |     |                                |     |     |
| 0.15 - 0.5      | 1                           | 1 | 1 | 1                           | 1 | 1 | 1                             | 1 | 1 | 1                              | 1   | 1 | 1                              | 1   | 1   | 0.8                            | 0.9 | 1   |
| 0.5 - 1.5 cm    | 1                           | 1 | 1 | 1                           | 1 | 1 | 1                             | 1 | 1 | 1                              | 1   | 1 | 1                              | 1   | 1   | 0.9                            | 1   | 1   |
| <b>Type 'F'</b> |                             |   |   |                             |   |   |                               |   |   |                                |     |   |                                |     |     |                                |     |     |
| 0.05 - 0.15     | 1                           | 1 | 1 | 1                           | 1 | 1 | 1                             | 1 | 1 | 0.8                            | 0.9 | 1 | 0.3                            | 0.6 | 0.9 | 0.2                            | 0.3 | 0.4 |
| 0.15 - 0.5      | 1                           | 1 | 1 | 1                           | 1 | 1 | 1                             | 1 | 1 | 0.9                            | 1   | 1 | 0.4                            | 0.7 | 0.9 | 0.2                            | 0.3 | 0.5 |
| 0.5 - 1.5       | 1                           | 1 | 1 | 1                           | 1 | 1 | 1                             | 1 | 1 | 1                              | 1   | 1 | 0.7                            | 1   | 1   | 0.4                            | 0.7 | 1   |
| 1.5 - 5         | 1                           | 1 | 1 | 1                           | 1 | 1 | 1                             | 1 | 1 | 1                              | 1   | 1 | 0.9                            | 1   | 1   | 0.7                            | 0.9 | 1   |
| 5 - 10          | 1                           | 1 | 1 | 1                           | 1 | 1 | 1                             | 1 | 1 | 1                              | 1   | 1 | 0.9                            | 1   | 1   | 0.7                            | 0.8 | 1   |
| 10 - 50 cm      | 1                           | 1 | 1 | 1                           | 1 | 1 | 1                             | 1 | 1 | 1                              | 1   | 1 | 1                              | 1   | 1   | 0.8                            | 1   | 1   |

431

432 **Supplementary Table 8: Vertical correction for Mega trawl.** Low (L), mid (M) and high (H) vertical  
433 correction factor  $C_s/C_i$  for Mega trawl (sampling depth  $d = 1$  m) per sea state and type/size categories of plastic  
434 objects. The median correction factor was calculated using the equation from Kukulka et al. 2012<sup>1</sup> with the  
435 median  $Wb$  of a size/type category and the mean sea surface wind speed relative to a sea state category. The low  
436 (resp. high) values were calculated with the 25<sup>th</sup> (resp. 75<sup>th</sup>) percentile of  $Wb$  and the upper (resp. lower) end  
437 value of sea surface wind speed relative to a sea state category.

438

439

440 **SUPPLEMENTARY REFERENCES**

- 441 1. Kukulka, T., Proskurowski, G., Morét-Ferguson, S., Meyer, D. & Law, K. The effect of  
442 wind mixing on the vertical distribution of buoyant plastic debris. *Geophys. Res. Lett.* **39**, 1-6  
443 (2012).
- 444 2. Law, K. L. *et al.* Distribution of surface plastic debris in the eastern Pacific Ocean from an  
445 11-year dataset. *Env. Sci. Technol.* **48**, 4732-4738 (2014).
- 446 3. Eriksen, M. *et al.* Plastic pollution in the world's oceans: more than 5 trillion plastic pieces  
447 weighing over 250,000 tons afloat at sea. *PLoS One* **9**, e111913;  
448 10.1371/journal.pone.0111913 (2014).
- 449 4. Reisser, J. *et al.* The vertical distribution of buoyant plastics at sea: an observational study  
450 in the North Atlantic Gyre. *Biogeosciences* **12**, 1249-1256 (2015).
- 451 5. Kooi, M. *et al.* The effect of particle properties on the depth profile of buoyant plastics in  
452 the ocean. *Sci. Rep.* **6**, 33882 (2016).
- 453 6. Cózar, A. *et al.* Plastic debris in the open ocean. *PNAS* **111**, 10239-10244 (2014).
- 454 7. Bland, J. M. & Altman, D. G. Measuring agreement in method comparison studies. *Stat.*  
455 *Methods Med Res.* **8**, 135-60 (1999).
- 456 8. Jambeck, J. R. *et al.* Plastic waste inputs from land into the ocean. *Science* **347**, 768-771  
457 (2015).
- 458 9. Yetman, G., Gaffin, S. R. & Xing X. Global 15 x 15 minute grids of the downscaled  
459 population based on the SRES B2 scenario, 1990 and 2025. NASA Socioeconomic Data and  
460 Applications Center (SEDAC) 10.7927/H4HQ3WTH (2004).
- 461 10. Gaffin, S. R., Rosenzweig, C., Xing, X. & Yetman, G. Downscaling and geo-spatial  
462 gridding of socio-economic projections from the IPCC special report on emissions scenarios  
463 (SRES). *Global Environ. Chang.* **14**, 105-123 (2004).
- 464 11. Gaffin, S. R., Xing, X. & Yetman, G. Country-level GDP and downscaled projections  
465 based on the SRES A1, A2, B1, and B2 marker scenarios, 1990-2100. NASA Socioeconomic  
466 Data and Applications Center (SEDAC) 10.7927/H4XW4GQ1 (2002).
- 467 12. Lebreton, L. *et al.* River plastic emissions to the world's oceans. *Nat. Commun.* **8**, 15611;  
468 10.1038/ncomms15611 (2017).
- 469 13. Watson, R.A. *et al.* Global marine yield halved as fishing intensity redoubles. *Fish Fish.*  
470 **14**, 493-503 (2013).
- 471 14. Bell, J. D., Watson, R. A. & Ye, Y. Global fishing capacity and fishing effort from 1950  
472 to 2012. *Fish Fish.* **18**, 792-793 (2016).
- 473 15. FAO. AQUASTAT main database. Retrieved on 24/04/2016 at [www.fao.org/nr/aquastat/](http://www.fao.org/nr/aquastat/)  
474 (2016).

- 475 16. GEBCO. The GEBCO\_2014 Grid (version 20150318, BODC). Retrieved on 24/04/2016  
476 at [https://www.gebco.net/data\\_and\\_products/gridded\\_bathymetry\\_data/](https://www.gebco.net/data_and_products/gridded_bathymetry_data/) (2014).
- 477 17. Halpern, B. S. *et al.* A global map of human impact on marine ecosystems. *Science* **319**,  
478 948-952 (2008).
- 479 18. UNCTAD. Merchant fleet by flag of registration and by type of ship, annual, 1980-2016.  
480 Retrieved on 11/04/2016 at <http://unctadstat.unctad.org> (2016).
- 481 19. International Coastal Cleanup. Tracking trash - 25 years of action for the ocean. Preprint  
482 at [http://act.oceanconservancy.org/pdf/Marine\\_Debris\\_2011\\_Report\\_OC.pdf](http://act.oceanconservancy.org/pdf/Marine_Debris_2011_Report_OC.pdf) (2011).
- 483 20. Arcadis. Economic assessment of policy measures for the implementation of the marine  
484 strategy framework directive. Preprint at  
485 <http://ec.europa.eu/environment/enveco/water/pdf/report.pdf> (2013).
- 486 21. Eunomia. Study to support the development of measures to combat a range of marine  
487 litter sources. Preprint at [http://ec.europa.eu/environment/marine/good-environmental-](http://ec.europa.eu/environment/marine/good-environmental-status/descriptor-10/pdf/MSFD%20Measures%20to%20Combat%20Marine%20Litter.pdf)  
488 [status/descriptor-10/pdf/MSFD%20Measures%20to%20Combat%20Marine%20Litter.pdf](http://ec.europa.eu/environment/marine/good-environmental-status/descriptor-10/pdf/MSFD%20Measures%20to%20Combat%20Marine%20Litter.pdf)  
489 (2016).
- 490 22. Goldstein, M. C., Rosenberg, M. & Cheng, L. Increased oceanic microplastic debris  
491 enhances oviposition in an endemic pelagic insect. *Biol. Lett.* **8**, 817-820 (2012).
- 492 23. Wong, C. S., Green, D. R. & Cretney, W. J. Quantitative tar and plastic waste  
493 distributions in the Pacific Ocean. *Nature* **247**, 30-32 (1974).
- 494 24. Shaw, D. G. & Mapes G. A. Surface circulation and the distribution of pelagic tar and  
495 plastic. *Mar. Pollut. Bull.* **10**, 160-162 (1979).
- 496 25. Day, R. H. & Shaw, D. G. Patterns in the abundance of pelagic plastic and tar in the  
497 North Pacific Ocean, 1976–1985. *Mar. Pollut. Bull.* **18**, 311-316 (1987).
- 498 26. Moore, C. J., Moore, S. L., Leecaster, M. K. & Weisberg, S. B. A comparison of plastic  
499 and plankton in the North Pacific central gyre. *Mar. Pollut. Bull.* **42**, 1297-1300 (2001).
